# Supplementary figures and images for: Design of a fluorinated magneto-responsive material with tuneable ultrasound scattering properties
Source: Royal Society of Chemistry journal article supplement (doi:10.1039/c3tb21585g), 2014-01-01

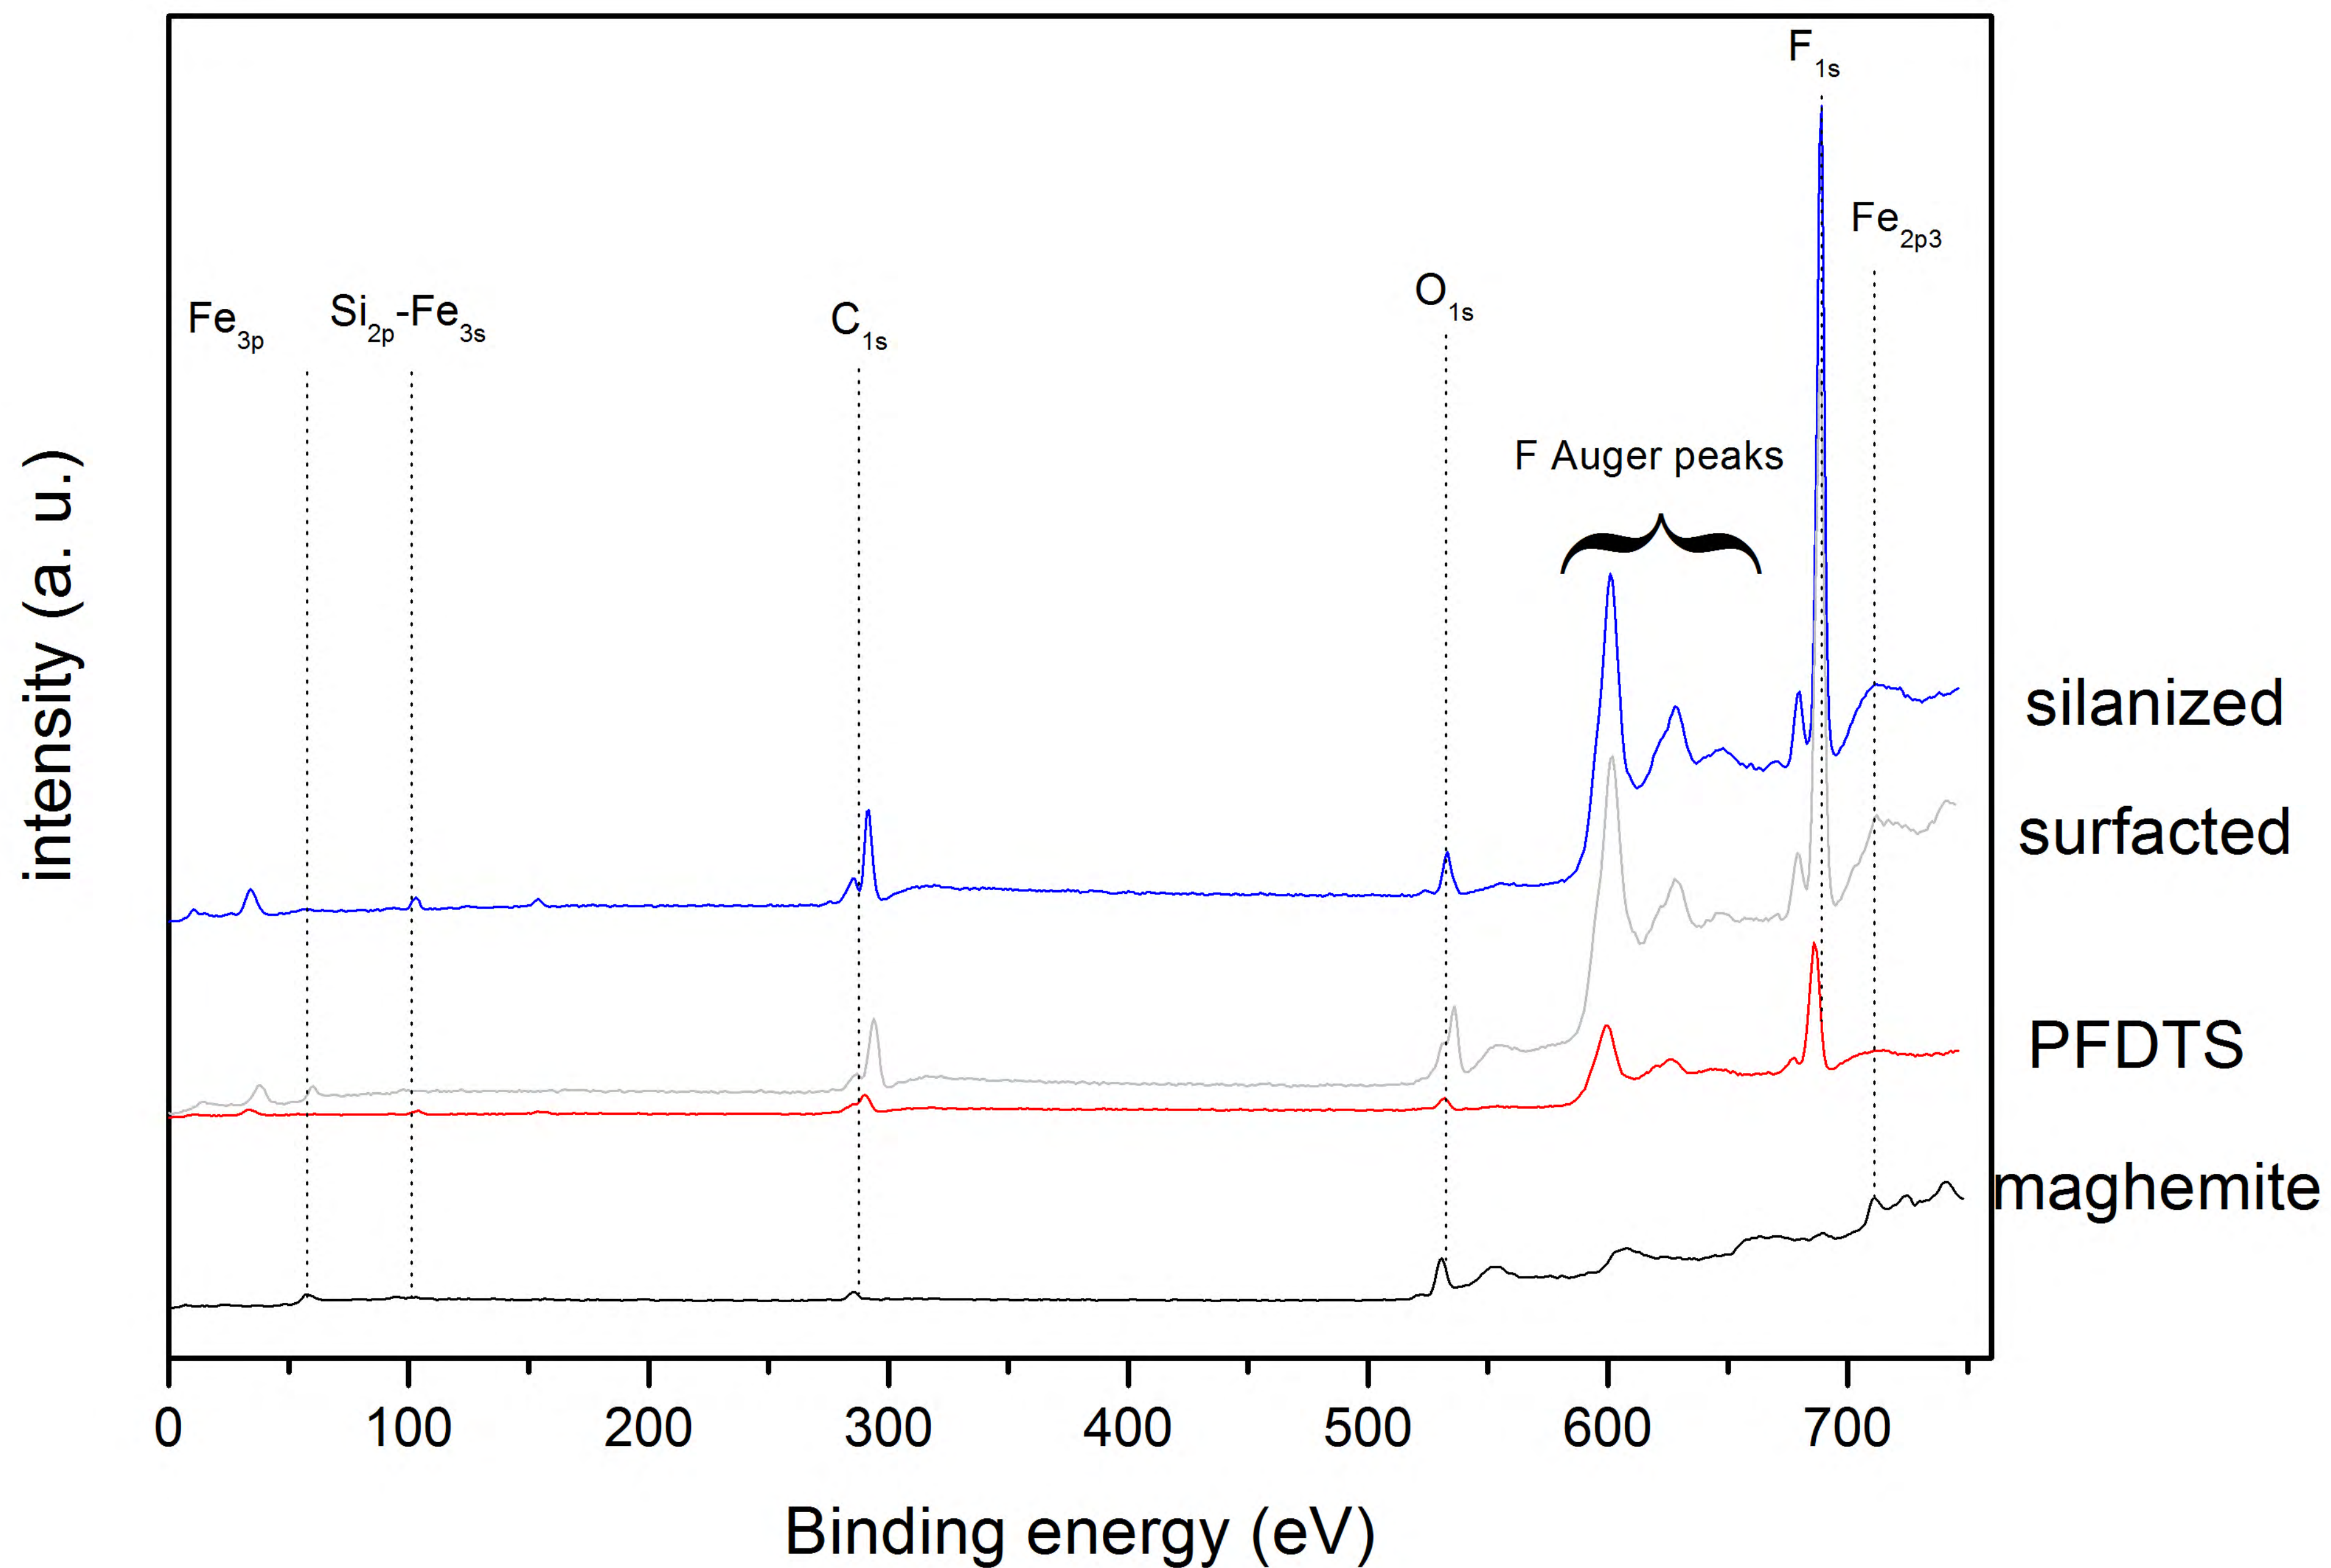

Supplement: c3tb21585g.pdf [file c3tb21585g.pdf]
